# Supplementary material for: Exploiting the potential of autophagy in cisplatin therapy: A new strategy to overcome resistance
Source: PubMed Central journal article supplement (PMC4558170; doi:10.18632/oncotarget.3902), 2015-05-06
Supplement: oncotarget-06-15551-s001.pdf [file oncotarget-06-15551-s001.pdf]

## SUPPLEMENTARY FIGURES

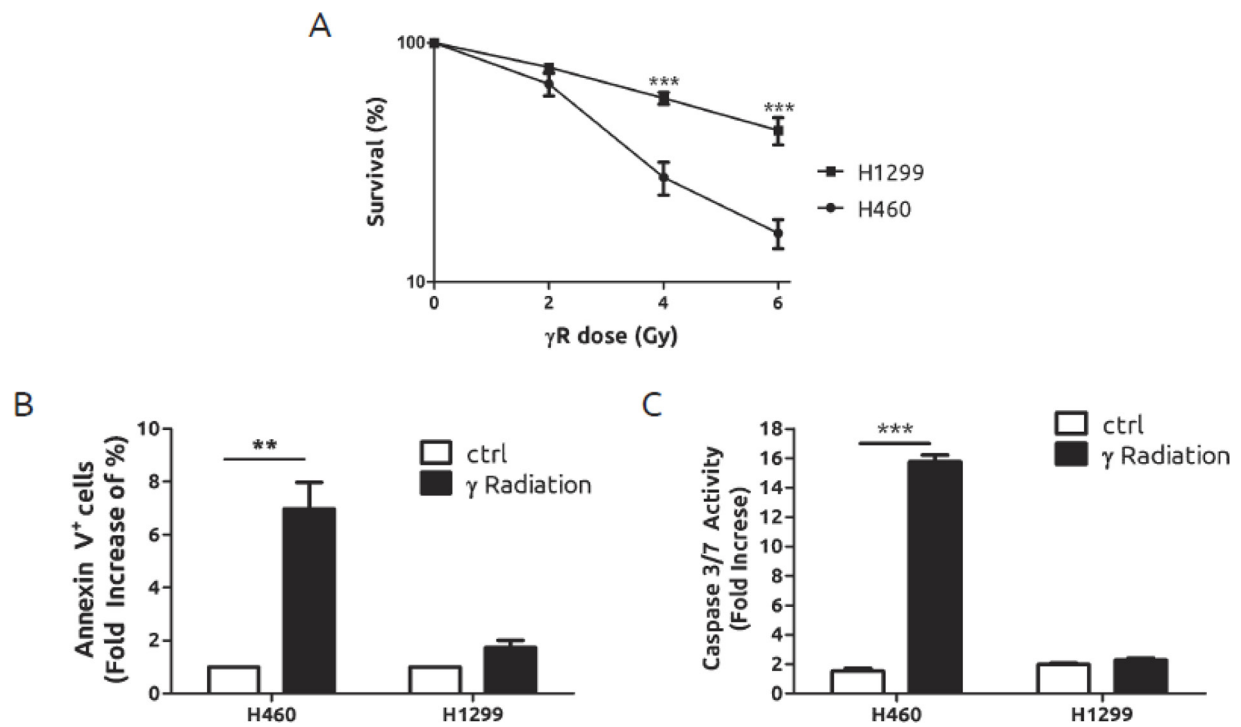

**Supplementary Figure S1:** **A.** Cells were treated with indicated doses of  $\gamma$  radiation and survival was measured by crystal violet 6 days after. **B.** Cells were treated with 10Gy and incubated for 36 hours before flow cytometry assay. **C.** Cells were treated as in (B) and processed for caspase activity evaluation.

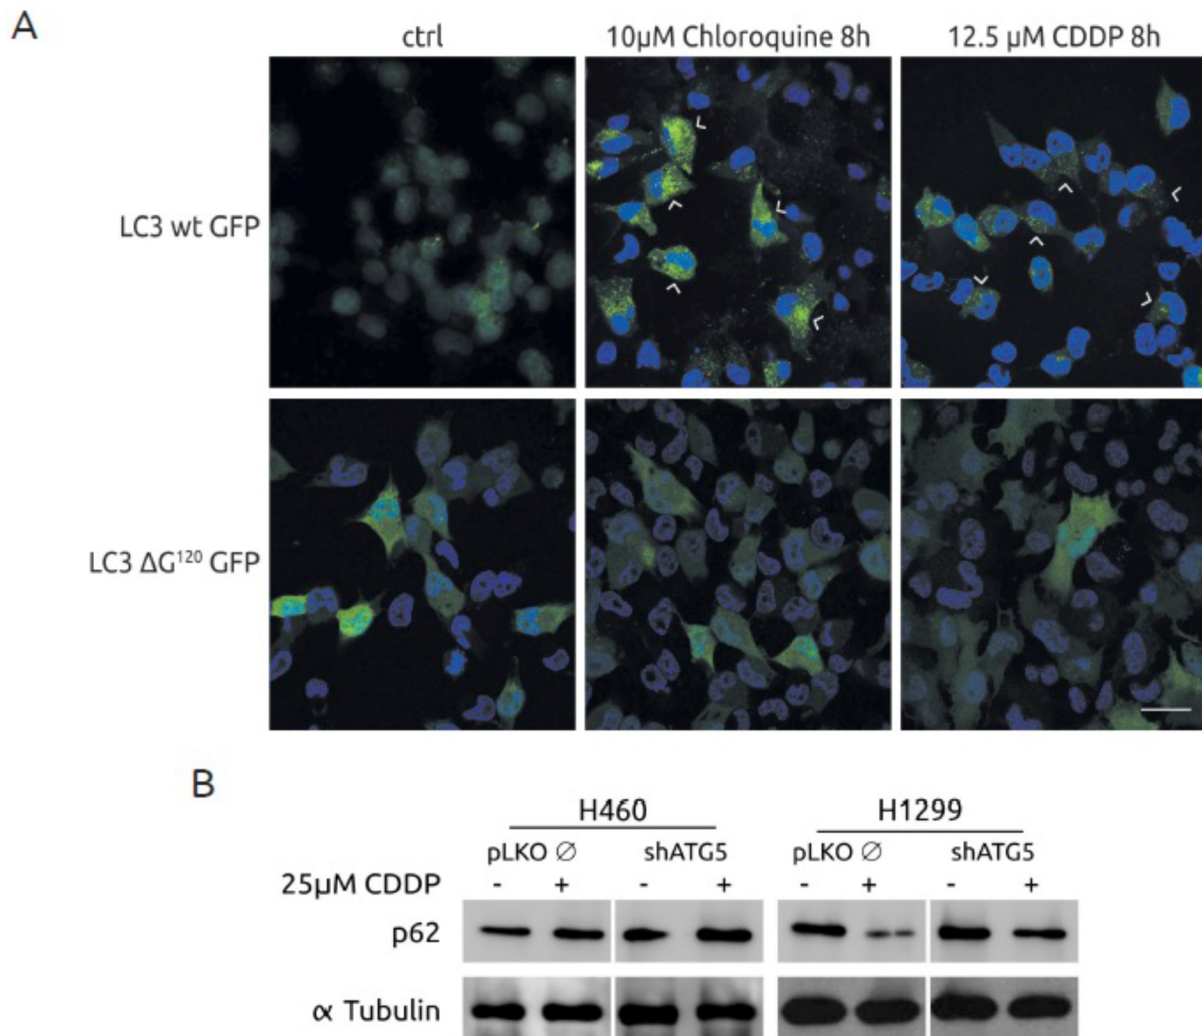

**Supplementary Figure S2: A.** H1299 cells were transfected with LC3wt-GFP or non-lipidable LC3 $\Delta$ G<sup>120</sup>-GFP and selected with G418 for, at least, 10 days and then treated with as indicated. Arrow tips indicate puncta where LC3-GFP accumulate. **B.** Lentivirus-infected cells (empty vector or shRNA-Atg5) were treated with 25  $\mu$ M CDDP for 36 h. Protein extracts were blotted with the indicated antibodies.

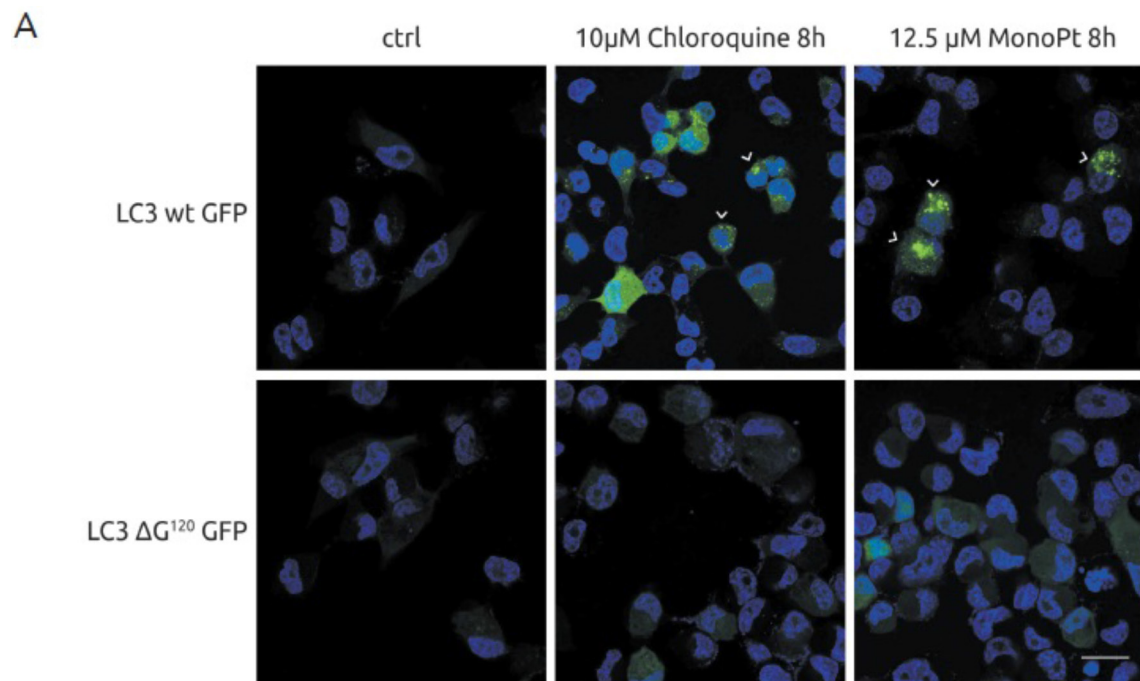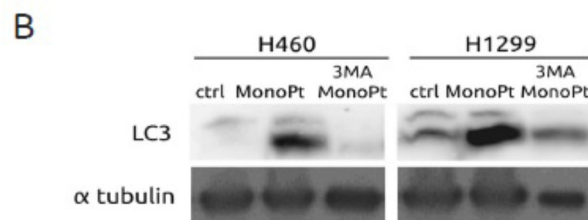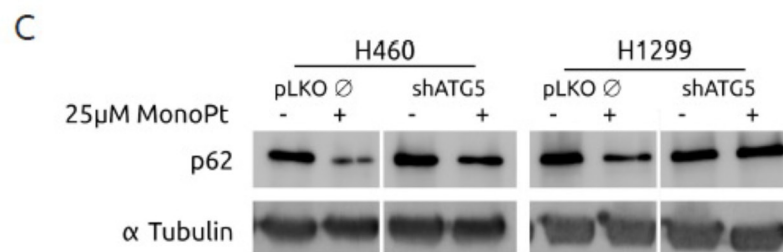

**Supplementary Figure S3: A.** H1299 cells were transfected with LC3wt-GFP or non-lipidable LC3 $\Delta$ G120-GFP and selected with G418 for, at least, 10 days and then treated with as indicated. Arrow tips indicate puncta where LC3-GFP accumulate. **B.** Cells were treated with 25  $\mu$ M MonoPt for 36 h in the presence or absence of 2.5 mM 3MA concomitantly. Protein extracts were blotted with the indicated antibodies. **C.** Lentivirus-infected cells (empty vector or shRNA-Atg5) were treated with 25  $\mu$ M MonoPt for 24 hours. Protein extracts were blotted with the indicated antibodies.

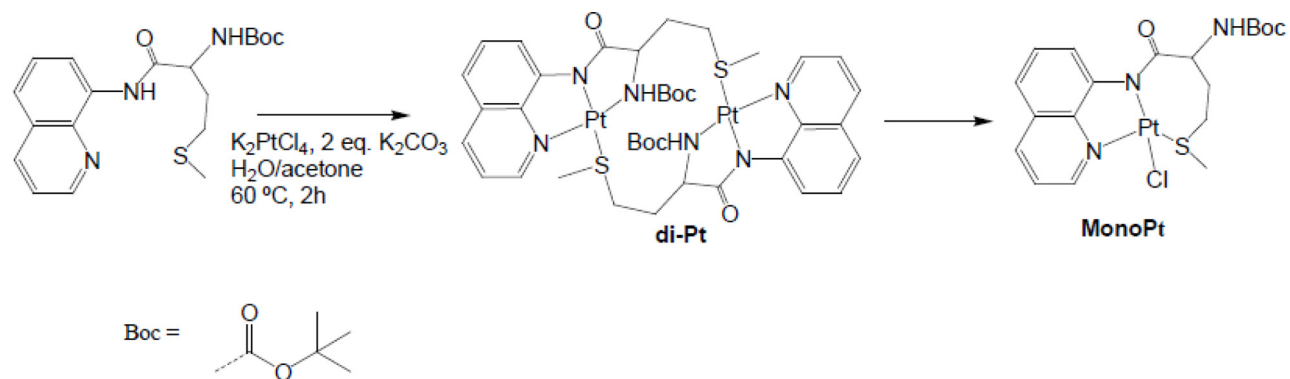

**Supplementary Figure S4: The scheme depicts the synthesis of MonoPt through its intermediate form Di-Pt. Synthesis**

**of Di-Pt.** In a Schlenk tube, an aqueous solution (2 mL) of  $\text{K}_2\text{PtCl}_4$  (83.0 mg, 0.2 mmol) and  $\text{K}_2\text{CO}_3$  (55.3 mg, 0.4 mmol) was added to another solution of the ligand (75.1 mg, 0.2 mmol) in acetone (2 mL). The mixture was stirred at  $60^\circ\text{C}$  for 2 hours, when the initial intense bubbling was already finished. The yellow precipitate was filtered, washed with 5 mL of water, and dried under vacuum. The product was obtained as a yellow to orange solid. Yield: 75.0 mg, 66%.  $^1\text{H}$  NMR ( $\text{CDCl}_3$ , 500 MHz, 298 K): 1.47 (s, 18H,  $\text{Me}^{\text{tBu}}$ ), 2.60 (m, 2H, aCH<sub>2</sub>), 2.68 (bs, 2H, aCH<sub>2</sub>), 2.94 (s, 6H, MeS), 3.11 (bd,  $J = 13.2$  Hz, 2H, bCH<sub>2</sub>), 4.00 (m, 2H, bCH<sub>2</sub>), 5.27 (bs, 2H, CH), 6.37 (bs, 2H, BCH), 7.13 (d,  $J = 7.4$  Hz, 2H, ACH), 7.51 (bt,  $J = 7.8$  Hz, 2H, ACH), 7.77 (bd,  $J = 7.4$  Hz, 2H, BCH), 8.15 (bs, 2H, BCH), 8.86 (d,  $J = 7.3$  Hz, 2H, ACH) ppm. MS (FAB<sup>+</sup>, 3-NBA):  $m/z$  (assign., rel int.%): 1137 [(M+H)<sup>+</sup>, 38.7], 1037 [(M - COOtBu+2H)<sup>+</sup>, 18.7], 937 [(M - 2COOtBu+3H)<sup>+</sup>, 8.1]. Molar conductivity value,  $\Lambda_{\text{M}}$ , in  $\text{CH}_3\text{CN}$ :  $22.4 \text{ S}\cdot\text{cm}^2\cdot\text{mol}^{-1}$ , in accordance with a molecular complex. Synthesis of MonoPt. In a Schlenk tube, to a solution of the Di-Pt complex (70.0 mg, 0.06 mmol) in  $\text{CH}_2\text{Cl}_2$  (5 mL), aqueous HCl (37%, 11.5  $\mu\text{l}$ , 0.13 mmol) was added, changing the color of the solution from orange to bright yellow with the evolution of the reaction. After 7 hours, the solvent was evaporated under vacuum, and the resulting solid washed with diethyl ether, being the product obtained a bright yellow solid. Yield: 62.0 mg, 85%. The  $^1\text{H}$  NMR spectrum is in accordance with the previous reported data.
